# Supplementary material for: Evaluation of Deep Learning Model Architectures for Point-of-Care Ultrasound Diagnostics
Source: MDPI journal article supplement (doi:10.3390/bioengineering11040392), 2024-04-18
Supplement: s1 [file s1]

## Supplementary Information

**Table S1.** Summary of top 3 performing architecture hyperparameter configurations based on Bayesian optimization for each scan site.

|       |                 | CNN Depth | Node Size | Multiplier | Filter Size | Dropout | Accuracy |
|-------|-----------------|-----------|-----------|------------|-------------|---------|----------|
| RUQ   | 1 <sup>st</sup> | 4         | 13        | 1.99356    | 7           | 3       | 0.867    |
|       | 2 <sup>nd</sup> | 5         | 16        | 1.96767    | 7           | 8       | 0.859    |
|       | 3 <sup>rd</sup> | 5         | 16        | 1.93826    | 7           | 8       | 0.857    |
| BLD   | 1 <sup>st</sup> | 2         | 2         | 1.61756    | 6           | 2       | 0.575    |
|       | 2 <sup>nd</sup> | 4         | 10        | 1.91307    | 7           | 5       | 0.57     |
|       | 3 <sup>rd</sup> | 5         | 11        | 1.86532    | 2           | 8       | 0.569    |
| PTX_B | 1 <sup>st</sup> | 3         | 16        | 1.82879    | 5           | 1       | 0.747    |
|       | 2 <sup>nd</sup> | 3         | 13        | 1.02141    | 2           | 5       | 0.744    |
|       | 3 <sup>rd</sup> | 3         | 16        | 1.17496    | 4           | 1       | 0.74     |
| PTX_M | 1 <sup>st</sup> | 2         | 16        | 1.00818    | 3           | 3       | 0.86     |
|       | 2 <sup>nd</sup> | 2         | 2         | 1.47797    | 3           | 9       | 0.853    |
|       | 3 <sup>rd</sup> | 2         | 12        | 1.02064    | 3           | 3       | 0.845    |
| HTX_B | 1 <sup>st</sup> | 4         | 16        | 1.008018   | 3           | 6       | 0.854    |
|       | 2 <sup>nd</sup> | 4         | 13        | 1.941593   | 5           | 6       | 0.842    |
|       | 3 <sup>rd</sup> | 5         | 16        | 1.677502   | 2           | 3       | 0.836    |
| HTX_M | 1 <sup>st</sup> | 3         | 16        | 1.832214   | 2           | 9       | 0.874    |
|       | 2 <sup>nd</sup> | 4         | 16        | 1.884837   | 2           | 9       | 0.866    |
|       | 3 <sup>rd</sup> | 3         | 16        | 1.192284   | 2           | 9       | 0.844    |

**Table S2.** Blind test performance metric summary for each model architecture for the RUQ scan site. Results are shown for each metric as mean values across the 5 LOSO runs with standard deviation shown in parentheses. Heat map overlay is setup for green coloring to indicate the stronger performing model for each row, metric.

| RUQ Scan Site Results |             |             |             |             |             |             |             |
|-----------------------|-------------|-------------|-------------|-------------|-------------|-------------|-------------|
|                       | Simple      | Optimized 1 | Optimized 2 | Optimized 3 | ShrapML     | MobileNetV2 | DarkNet53   |
| Accuracy              | 0.71(±0.07) | 0.7(±0.08)  | 0.66(±0.09) | 0.72(±0.09) | 0.73(±0.08) | 0.74(±0.09) | 0.67(±0.13) |
| AUROC                 | 0.78(±0.12) | 0.76(±0.05) | 0.74(±0.06) | 0.76(±0.11) | 0.81(±0.06) | 0.79(±0.06) | 0.72(±0.16) |
| F1                    | 0.71(±0.08) | 0.72(±0.06) | 0.68(±0.09) | 0.72(±0.09) | 0.75(±0.06) | 0.73(±0.14) | 0.65(±0.22) |
| Precision             | 0.72(±0.15) | 0.73(±0.18) | 0.68(±0.18) | 0.74(±0.16) | 0.75(±0.16) | 0.77(±0.14) | 0.67(±0.19) |
| Recall                | 0.74(±0.2)  | 0.76(±0.19) | 0.74(±0.2)  | 0.74(±0.16) | 0.79(±0.14) | 0.72(±0.22) | 0.7(±0.31)  |
| Specificity           | 0.67(±0.2)  | 0.64(±0.3)  | 0.58(±0.27) | 0.69(±0.24) | 0.68(±0.26) | 0.76(±0.18) | 0.64(±0.26) |

\*Results shown as Average (± Standard Deviation)
